# Supplementary material for: Characterization of the Structural Requirements for the NADase Activity of Bacterial Toll/IL-1R domains in a Course-based Undergraduate Research Experience
Source: PubMed Central journal article supplement (PMC11374754; doi:10.4049/immunohorizons.2300062), 2024-08-22
Supplement: IH_2300062_Supplemental_3.pdf [file IH_2300062_Supplemental_3.pdf]

Supplemental Table I: Site-Directed Mutagenesis Primers Used in this Study

| <b>Mutation</b> | <b>Primers (forward and reverse complement)</b>                                                                                   |
|-----------------|-----------------------------------------------------------------------------------------------------------------------------------|
| AbTir D136A     | 5'-GCGGTGCTAGCGAATATGCTCTGTTTATTAGCCATGCGAG<br>5'-CTCGCATGGCTAATAAACAGAGCATATTCGCTAGCACCGC                                        |
| AbTir F138A     | 5'-GTGCTAGCGAATATGATCTGGCTATTAGCCATGCGAGCGAAG<br>5'-CTTCGCTCGCATGGCTAATAGCCAGATCATATTCGCTAGCAC                                    |
| AbTir S140A     | 5'-CGAATATGATCTGTTTATTGCCATGCGAGCGAAGATAAAG<br>5'-CTTTATCTTCGCTCGCATGGGCAATAAACAGATCATATTCG                                       |
| AbTir H141A     | 5'-CGAATATGATCTGTTTATTAGCGCTGCGAGCGAAGATAAAGAAG<br>5'-CTTCTTTATCTTCGCTCGCAGCGCTAATAAACAGATCATATTCG                                |
| AbTir K146A     | 5'-CCATGCGAGCGAAGATGCAGAAGATTTTGTGCGC<br>5'-GCGCACAAAATCTTCTGCATCTTCGCTCGCATGG                                                    |
| AbTir V150A     | 5'-GAAGATAAAGAAGATTTTGC GCGCCCGCTGGCGGAAACC<br>5'-GGTTTCCGCCAGCGGGCGCGCAAATCTTCTTTATCTTC                                          |
| AbTir R151A     | 5'-GAAGATAAAGAAGATTTTGTGGCCCCGCTGGCGGAAACCCTGC<br>5'-GCAGGGTTTCCGCCAGCGGGGCCACAAAATCTTCTTTATCTTC                                  |
| AbTir D167A     | 5'-GGCGTGAACGTGTGGTATGCTGAATTTACCCTGAAAGTGG<br>5'-CCACTTTCAGGGTAAATTCAGCATAACCACACGTTTCACGCC                                      |
| AbTir V193A     | 5'-CAGCAAATATGGCACCGCGGTGCTGAGCACCG<br>5'-CGGTGCTCAGCACCGCGGTGCCATATTTGCTG                                                        |
| AbTir K201A     | 5'-GCTGAGCACCGATTTTATTGCAAAGATTGGACCAACTATG<br>5'-CATAGTTGGTCCAATCTTTTGCAATAAAATCGGTGCTCAGC                                       |
| AbTir W204A     | 5'-CCGATTTTATTAATAAAGATGCGACCAACTATGAACTGGATGG<br>5'-CCATCCAGTTCATAGTTGGTCGCATCTTTTTTAATAAAATCGG                                  |
| AbTir E208A     | 5'-TTTATTAATAAAGATTGGACCAACTATGCACTGGATGGCCTGGTGGCGCGCAAATGAAC<br>5'-GTTCAATTCGCGCGCCACCAGGCCATCCAGTGCATAGTTGGTCCAATCTTTTTTAATAAA |
| AbTir R215A     | 5'-CTGGATGGCCTGGTGGCGGCCGAAATGAACGGCCATAAAATG<br>5'-CATTTTATGGCCGTTCAATTCGGCCGCCACCAGGCCATCCAG                                    |
| AbTir M222A     | 5'-GCGAAATGAACGGCCATAAAGCGATTCTGCCGATTTGGC<br>5'-GCCAAATCGGCAGAATCGCTTTATGGCCGTTTCATTTGCG                                         |
| AbTir Y238A     | 5'-CAAAAACGATGTGCTGGATGCTAGCCCGAACCTGGCGGATAAAG<br>5'-CTTTATCCGCCAGGTTCCGGGCTAGCATCCAGCACATCGTTTTTTG                              |
| AbTir N249A     | 5'-GGCGGATAAAGTGGCGCTGGCCACCAGCGTGAACAGCATTG<br>5'-CAATGCTGTTACGCTGGTGGCCAGCGCCACTTTATCCGCC                                       |
| TcpC F174A      | 5'-GTGCTAGCCATTACGACTTCGCCATATCACATGCCAAAGAAG<br>5'-CTTCTTTGGCATGTGATATGGCGAAGTCGTAATGGCTAGCAC                                    |
| TcpC S176A      | 5'-GCCATTACGACTTCTTCATAGCACATGCCAAAGAAGATAAG<br>5'-CTTATCTTCTTTGGCATGTGCTATGAAGAAGTCGTAATGGC                                      |
| TcpC H177A      | 5'-CATTACGACTTCTTCATATCAGCTGCCAAAGAAGATAAGGACAC<br>5'-GTGTCCTTATCTTCTTTGGCAGCTGATATGAAGAAGTCGTAATG                                |
| TcpC K182A      | 5'-CATATCACATGCCAAAGAAGATGCGGACACATTCGTTCCGCC<br>5'-GGGCGAACGAATGTGTCCGCATCTTCTTTGGCATGTGATATG                                    |
| TcpC R187A      | 5'-GAAGATAAGGACACATTCGTTGCACCCTTGGTCGACGAATTAATC<br>5'-GATTTAATTCGTCGACCAAGGGTGCAACGAATGTGTCCTTATCTTC                             |
| TcpC D203A      | 5'-GGCGTCATAATCTGGTACGCTGAGCAGACGCTGGAAGTAG<br>5'-CTACTCCAGCGTCTGCTCAGCGTACCAGATTATGACGCC                                         |

|            |                                                                                                                                 |
|------------|---------------------------------------------------------------------------------------------------------------------------------|
| TcpC V229A | 5'-GAAAGCAAATTATGGCATCGCAATCCTGTCCCACAAC TTC<br>5'-GAAGTTGTGGGACAGGATTGCGATGCCATAATTTGCTTTC                                     |
| TcpC W240A | 5'-CCACAAC TTCTTAAATAAGAAAGCGACCCAGTATGAGTTGGATT CGC<br>5'-GCGAATCCA ACTCATACTGGGTCGCTTCTTATTTAAGAAGTTGTGG                      |
| TcpC E244A | 5'-CTTAAATAAGAAATGGACCCAGTATGCATTGGATT CGCTTATTAACCGTGCGGTTTAC<br>5'-GTAAACCGCACGGTTAATAAGCGAATCCAATGCATACTGGGTCCATTTCTTATTTAAG |
| TcpC K258A | 5'-GCGGTTTACGATGACAATGCAATCATATTACCTATCTGGCATAAC<br>5'-GTTATGCCAGATAGGTAATATGATTGCATTGTCATCGTAAACCGC                            |
| TcpC Y275A | 5'-CGCACAAGAAGTGAGTAAGGCCTCTCACTACCTGGCAGAC<br>5'-GTCTGCCAGGTAGTGAGAGGCCTTACTCACTTCTTGTGCG                                      |

Supplemental Table II: Students enrolled in the CURE course 2019-2022

---

|                    |                          |                     |
|--------------------|--------------------------|---------------------|
| Alexander,Zachary  | David, Jaira             | Riedlbauer,Dalton   |
| Calkins,Phoebe     | De Leon,Raquel           | Schwartz,Jonathan   |
| Chaudhry,Sumra     | DeLoach,Kayla            | Stefano,Alanna      |
| Chomiak,Emily      | Do,Aaron                 | Walsh,Kelly         |
| Clark,Kishore      | Eromosele,Itohan         | Williams,Alexa      |
| Conteh,Maimunah    | Hillman,Jake             | Akindileni,Kehinde  |
| Dada,Tope          | Madison Jr,Robert        | Armstrong,Chyna     |
| Fallah, Daniel     | Melo-Gomez,Juliana       | Bader,Charlotte     |
| Hamilton,Sarah     | Morales,Nadia            | Biswas,Aditi        |
| Jiang,Evelyn       | Owolabi,Olutobi          | Budd,Stephen        |
| Jones,Brandon      | Papageorgopoulos,William | Collins,Haley       |
| Keshmiri,Nastaran  | Pascoe,Emily             | Duff,Rachel         |
| Mark,Ashley        | Sadowski,Lauren          | Elsayed,Sarah       |
| Moody,Jack         | Shrestha,Amulya          | Guadagno,Maria      |
| Ojo,Michael        | Suissa,Chad              | Jean Baptiste,Henri |
| Poteat,Ariana      | Anderson,Jasmine         | Jones,Jaliyl        |
| Riaz,Tahreem       | Atkinson,Sy'mone         | Kalu,Kelechi        |
| Rolle,Louis        | Badejo,Zainab            | Langhorn,Trevor     |
| Smith,Meeko        | Campbell III,Michael     | Onwezi-Nwugwo,Jaine |
| So,Nathan          | Essilfie,Marina          | Scudder,Alexis      |
| Adeoye,Joycelyn    | Evangelista,Justin       | Shoemaker,Payton    |
| Akin Abu,Gold      | Mercanti,Mark            | Sterling,Michaela   |
| Akindele,Mercy     | Njoroge,Wambui           | Sultana,Samina      |
| Akinwale,Oluwatobi | Portales Rivera,Alfredo  | Toneygay,Lindsey    |
| Darbasie,Brianna   | Price,Sarah              | Wiles,Monica        |

---
